# Supplementary material for: The Health-Seeking Behavior among Malaysian Adults in Urban and Rural Areas Who Reported Sickness: Findings from the National Health and Morbidity Survey (NHMS) 2019
Source: MDPI journal article supplement (doi:10.3390/ijerph19063193), 2022-03-08
Supplement: s1 [file s1]

Table S1. Logistic regression model for self-rated health as poor to very poor among Malaysian adults who reported sickness

| Factors                                                 | Crude OR<br>(95% CI)  | Adjusted OR<br>(95% CI) |
|---------------------------------------------------------|-----------------------|-------------------------|
| <b>Sex</b>                                              |                       |                         |
| Male                                                    | 1.00 (ref)            |                         |
| Female                                                  | 0.77 (0.48 - 1.23)    |                         |
| <b>Ethnicity</b>                                        |                       |                         |
| Malay                                                   | 1.00 (ref)            |                         |
| Non-Malay                                               | 1.24 (0.70 - 2.19)    |                         |
| <b>Age (years)</b>                                      |                       |                         |
| 18-34                                                   | 1.00 (ref)            | 1.00 (ref)              |
| 35-59                                                   | 1.76 (0.90 - 3.42)    | 1.13 (0.46 - 2.82)      |
| 60+                                                     | 3.08 (1.52 - 6.25)*   | 0.90 (0.34 - 2.33)      |
| <b>Education level</b>                                  |                       |                         |
| No formal                                               | 2.81 (1.30 - 6.07)**  | 1.86 (0.75 - 4.57)      |
| Primary                                                 | 2.06 (1.16 - 3.65)*   | 1.57 (0.86 - 2.84)      |
| Secondary                                               | 1.00 (ref)            | 1.00 (ref)              |
| Tertiary                                                | 0.51 (0.22 - 1.17)    | 0.71 (0.29 - 1.74)      |
| <b>Marital status</b>                                   |                       |                         |
| Single                                                  | 0.76 (0.40 - 1.45)    | 1.40 (0.65 - 3.02)      |
| Married                                                 | 1.00 (ref)            | 1.00 (ref)              |
| Widow(er)/Divorcee/Sepa-<br>rated                       | 1.77 (0.98 - 3.21)    | 0.99 (0.48 - 2.03)      |
| <b>Employment status</b>                                |                       |                         |
| Government                                              | 0.45 (0.09 - 2.27)    | 0.65 (0.13 - 3.31)      |
| Private                                                 | 0.67 (0.25 - 1.77)    | 0.83 (0.27 - 2.51)      |
| Self-employed                                           | 1.00 (ref)            | 1.00 (ref)              |
| Unemployed                                              | 2.11 (1.02 - 4.40)*   | 1.87 (0.90 - 3.86)      |
| <b>Household income quin-<br/>tile</b>                  |                       |                         |
| Q1 (20% poorest)                                        | 3.90 (1.60 - 9.50)**  | 1.65 (0.65 - 4.18)      |
| Q2                                                      | 2.44 (0.94 - 6.34)    | 1.51 (0.56 - 4.10)      |
| Q3                                                      | 1.63 (0.63 - 4.15)    | 1.30 (0.52 - 3.25)      |
| Q4                                                      | 2.10 (0.75 - 5.90)    | 1.89 (0.64 - 5.09)      |
| Q5 (20% richest)                                        | 1.00 (ref)            | 1.00 (ref)              |
| <b>Covered by any healthcare<br/>coverage</b>           |                       |                         |
| Yes                                                     | 0.62 (0.36 - 1.08)    | 1.13 (0.46 - 2.82)      |
| No                                                      | 1.00 (ref)            | 0.90 (0.35 - 2.33)      |
| <b>Presence of at least one<br/>long-term condition</b> |                       |                         |
| Yes                                                     | 2.93 (1.78 - 4.84)*** | 2.30 (1.19 - 4.43)*     |
| No                                                      | 1.00 (ref)            | 1.00 (ref)              |

COR, Crude Odd Ratios; AOR, Adjusted Odd Ratios; CI, Confidence Interval; ref, reference category; Q, Quintile; \*p<0.05; \*\*p<0.01; \*\*\*p<0.001.

Healthcare coverage refers to government employees' health benefits, pensioner card, government-specific health fund, personal health insurance, employer-sponsored insurance, and panel clinic.
